# Supplementary material for: Enhanced Nasal Deposition and Anti-Coronavirus Effect of Favipiravir-Loaded Mucoadhesive Chitosan–Alginate Nanoparticles
Source: MDPI journal article supplement (doi:10.3390/pharmaceutics14122680), 2022-12-01
Supplement: s1 [file s1]

# Enhanced Nasal Deposition and Anti-coronavirus Effect of Favipiravir-Loaded Mucoadhesive Chitosan-Alginate Nanoparticles

Khent Primo Alcantara, Nonthaneth Nalinratana, Nopporn Chutiwitoonchai, Agnes L. Castillo, Wijit Banlunara, Opa Vajragupta, Pornchai Rojsitthisak, Pranee Rojsitthisak

## S1. SUPPLEMENTARY METHODS

### S1.1 Collection and preparation of the tissue

Porcine nasal mucosa (PNM) was excised from the noses of freshly slaughtered pigs in the local slaughterhouse. The noses were cross-sectioned using a pathology saw through each nostril to expose the tissue. The mucosa was excised using a surgical blade and forceps to separate the underlying nasal septal cartilage. The PNM was washed in normal saline solution (NSS) and submerged in Hanks' solution to maintain tissue integrity.

### S1.2 Cell and virus preparation

RPMI 2650 human nasal epithelial cells (ATCC, USA) were cultivated in MEM media supplemented with 10% (v/v) fetal bovine serum (FBS) at 37 °C in a 95% air/5% CO<sub>2</sub> incubator. PEDV carrying the mCherry fluorescent reporter gene (mCherry-PEDV) in its genome was used as a coronavirus surrogate for the antiviral assay. The viral genome was constructed by reverse genetics, and the infectious viral particles were prepared as reported previously [1]. Vero cells stably expressing eGFP, a green fluorescent protein (eGFP-Vero), were constructed by transfecting the pEGFP-N1 (Clontech, USA) plasmid into Vero cells (ATCC: CCL-81) and selecting the eGFP positive cells using 0.8 mg/mL of G418 antibiotic (Sigma Aldrich, USA). The cells were maintained in Opti-MEM (Gibco, USA) supplemented with 10% (v/v) fetal bovine serum and antibiotics.

### S1.3 Cytotoxicity assay

The eGFP-Vero cells were seeded overnight at a density of  $2.5 \times 10^4$  in a 96-well tissue culture microplate at 37 °C in a 5% CO<sub>2</sub> incubator. The formulation and free FVR were diluted in sterile water or blank-MCS-ALG-NPs and added to the cells at various concentrations. The sterile water-treated cells or the blank MCS-ALG-NPs were used as the control to observe the cytotoxic effects of the test samples. After 18 h of treatment, the cytotoxicity was determined by adding Cell Counting Kit-8 (CCK-8) reagent (Dojindo Molecular Technologies, USA) to the cells and incubating for 1 h. The optical density at OD<sub>450</sub> was measured using an EnSight Multimode Plate Reader (PerkinElmer, USA).

**Table S1** Statistical analysis of the mathematical model

|                            | $Y_1$           | $Y_2$           | $Y_3$           | $Y_4$           |
|----------------------------|-----------------|-----------------|-----------------|-----------------|
| <b>ANOVA for the model</b> |                 |                 |                 |                 |
| Sum of squares             | 5517.47         | 54.10           | 660.74          | 6554.42         |
| Degree of freedom          | 3               | 7               | 7               | 7               |
| Mean squares               | 1839.16         | 7.73            | 94.39           | 9.36.35         |
| <i>F</i> -value            | 53.21           | 45.22           | 91.11           | 69.37           |
| <i>p</i> -value            | <0.0001         | <0.0001         | <0.0001         | <0.0001         |
| Inference                  | significant     | significant     | significant     | significant     |
| <b>Lack-of-fit test</b>    |                 |                 |                 |                 |
| Sum of squares             | 335.37          | 0.8690          | 6.95            | 87.52           |
| Degree of freedom          | 9               | 5               | 5               | 5               |
| Mean squares               | 37.26           | 0.1738          | 1.39            | 17.50           |
| <i>F</i> -value            | 1.66            | 1.06            | 9.24            | 5.03            |
| <i>p</i> -value            | 0.4312          | 0.5502          | 0.1005          | 0.1741          |
| Inference                  | not significant | not significant | not significant | not significant |
| <b>Residual</b>            |                 |                 |                 |                 |
| Sum of squares             | 380.18          | 1.20            | 7.25            | 94.48           |
| Degree of freedom          | 11              | 7               | 7               | 7               |
| Mean squares               | 34.56           | 0.1790          | 1.04            | 13.50           |

**Table S2** Fit summary and the selected mathematical model of the responses

| Model                           | Sequential<br><i>p</i> -value | Lack of Fit<br><i>p</i> -value | Adjusted<br>R <sup>2</sup> | Predicted<br>R <sup>2</sup> | Adequate<br>precision | Remarks   |
|---------------------------------|-------------------------------|--------------------------------|----------------------------|-----------------------------|-----------------------|-----------|
| Response: <i>Y</i> <sub>1</sub> |                               |                                |                            |                             |                       |           |
| Linear                          | < 0.0001                      | 0.4312                         | 0.918                      | 0.8729                      | 21.9385               | Suggested |
| 2FI                             | 0.143                         | 0.5328                         | 0.9407                     | 0.8653                      |                       |           |
| Quadratic                       | 0.8048                        | 0.3743                         | 0.9208                     | 0.6516                      |                       |           |
| Response: <i>Y</i> <sub>2</sub> |                               |                                |                            |                             |                       |           |
| Linear                          | 0.4431                        | 0.0332                         | − 0.0073                   | − 0.6778                    | 25.6039               | Suggested |
| 2FI                             | 0.0726                        | 0.0504                         | 0.394                      | − 0.7722                    |                       |           |
| Quadratic                       | 0.0006                        | 0.5854                         | 0.9627                     | 0.8681                      |                       |           |
| Response: <i>Y</i> <sub>3</sub> |                               |                                |                            |                             |                       |           |
| Linear                          | 0.0147                        | 0.0051                         | 0.4922                     | 0.371                       | 24.8412               | Suggested |
| 2FI                             | 0.8341                        | 0.0037                         | 0.3695                     | 0.0293                      |                       |           |
| Quadratic                       | 0.0002                        | 0.0829                         | 0.9775                     | 0.8776                      |                       |           |
| Response: <i>Y</i> <sub>4</sub> |                               |                                |                            |                             |                       |           |
| Linear                          | 0.1088                        | 0.008                          | 0.2499                     | − 0.0122                    | 22.1788               | Suggested |
| 2FI                             | 0.947                         | 0.0056                         | 0.0123                     | − 0.9547                    |                       |           |
| Quadratic                       | < 0.0001                      | 0.1604                         | 0.9734                     | 0.8621                      |                       |           |

**Table S3** Release kinetics of free FVR solution

| Model                                                                         | Media  | Parameter                                                | Adjusted R <sup>2</sup> | AIC     | MSC    |
|-------------------------------------------------------------------------------|--------|----------------------------------------------------------|-------------------------|---------|--------|
| Zero-order<br>( $F = k_0 \cdot t$ )                                           | SNF    | $K_0 = 6.96$                                             | − 1.49                  | 142.81  | − 1.72 |
|                                                                               | pH 7.4 | $K_0 = 7.14$                                             | − 1.25                  | 143.41  | − 1.52 |
| First-order<br>( $F = 100 \cdot e^{-k_1 t}$ )                                 | SNF    | $k_1 = 0.48$                                             | 0.76                    | 109.77  | 0.64   |
|                                                                               | pH 7.4 | $k_1 = 0.52$                                             | 0.87                    | 103.46  | 1.34   |
| Higuchi<br>( $F = k_H \cdot t^{0.5}$ )                                        | SNF    | $K_H = 28.55$                                            | 0.41                    | 122.52  | − 0.27 |
|                                                                               | pH 7.4 | $K_H = 29.29$                                            | 0.48                    | 122.72  | − 0.04 |
| Korsmeyer-Peppas<br>( $F = k_{KP} \cdot t^n$ )                                | SNF    | $k_{KP} = 54.32$ ,<br>$n = 0.237$                        | 0.97                    | 83.16   | 2.54   |
|                                                                               | pH 7.4 | $k_{KP} = 53.80$ ,<br>$n = 0.22$                         | 0.94                    | 94.28   | 1.90   |
| Hixson-Crowell<br>( $F = 100 \cdot [1 - (1 - k_{HC} \cdot t)^3]$ )            | SNF    | $k_{HC} = 0.07$                                          | 0.39                    | 123.03  | − 0.31 |
|                                                                               | pH 7.4 | $k_{HC} = 0.07$                                          | 0.50                    | 122.21  | − 0.01 |
| <sup>a</sup> Weibull<br>( $F = 100 \cdot [1 - e^{-(t-T_i)^{\beta/\alpha}}]$ ) | SNF    | $\alpha = 1.551$ ,<br>$\beta = 0.369$ ,<br>$T_i = 0.187$ | 0.9894                  | 65.1715 | 3.8132 |
|                                                                               | pH 7.4 | $\alpha = 1.23$ ,<br>$\beta = 0.46$ ,<br>$T_i = 0.14$    | 0.99                    | 62.76   | 4.24   |

<sup>a</sup>Best fit release kinetic model for free FVR.  $F$ : fraction (%) of drug released in time  $t$ ;  $k_0$ : zero-order release constant;  $k_1$ : first-order release constant;  $k_H$ : Higuchi release constant;  $k_{KP}$ : release constant incorporating structural and geometric characteristics of the drug-dosage form;  $n$ : diffusional exponent indicating the drug release mechanism;  $\alpha$ : scale parameter defining the time scale of the process;  $\beta$  is shape parameter characterizing the curve shape as exponential ( $\beta = 1$ ), sigmoid or S-shaped, with upward curvature followed by a turning point ( $\beta > 1$ ), or parabolic, with a higher initial slope and then consistent with an exponential ( $\beta < 1$ ) [2];  $T_i$ : location parameter representing the lag time before the onset of the dissolution or release process, which in most cases will be near zero;  $k_{HC}$  is the Hixon-Crowell release constant. The transport mechanism based on the “ $n$ ” value of Korsmeyer-Peppas is described as: (1)  $n \leq 0.5$ , the drug diffusion from the polymer matrix corresponds to a Fickian diffusion or a quasi-Fickian diffusion mechanism. (2)  $0.5 < n < 1$ , an anomalous, non-Fickian drug diffusion occurs. (3)  $n = 1$ , a non-Fickian, case of II (relaxational) transport or zero-order release kinetics could be observed, and (4)  $n > 1$ , super case II transport was observed [3].

**Table S4** Release kinetic of FVR from MCS-ALG-NPs

| Model                                                                      | Media  | Parameter                                             | Adjusted R <sup>2</sup> | AIC    | MSC    |
|----------------------------------------------------------------------------|--------|-------------------------------------------------------|-------------------------|--------|--------|
| Zero-order<br>( $F = k_0 \cdot t$ )                                        | SNF    | $K_0 = 6.32$                                          | − 1.68                  | 141.84 | − 1.78 |
|                                                                            | pH 7.4 | $K_0 = 4.72$                                          | − 1.05                  | 133.17 | − 1.30 |
| First-order<br>( $F = 100 \cdot e^{-k_1 t}$ )                              | SNF    | $k_1 = 0.37$                                          | 0.64                    | 113.87 | 0.21   |
|                                                                            | pH 7.4 | $k_1 = 0.14$                                          | 0.35                    | 117.09 | − 0.15 |
| Higuchi<br>( $F = k_H \cdot t^{0.5}$ )                                     | SNF    | $K_H = 26.24$                                         | 0.30                    | 123.04 | − 0.44 |
|                                                                            | pH 7.4 | $K_H = 19.55$                                         | 0.48                    | 113.84 | 0.08   |
| Korsmeyer-Peppas<br>( $F = k_{KP} \cdot t^n$ )                             | SNF    | $k_{KP} = 51.34$ ,<br>$n = 0.19$                      | 0.92                    | 93.30  | 1.68   |
|                                                                            | pH 7.4 | $k_{KP} = 53.21$ ,<br>$n = 0.21$                      | 0.94                    | 93.20  |        |
| Hixson-Crowell<br>( $F = 100 \cdot [1 - (1 - k_{HC} \cdot t)^3]$ )         | SNF    | $k_{HC} = 0.06$                                       | 0.29                    | 123.21 | − 0.45 |
|                                                                            | pH 7.4 | $k_{HC} = 0.04$                                       | 0.1822                  | 120.33 | − 0.39 |
| <sup>a</sup> Weibull<br>( $F = 100 \cdot [1 - e^{-(t-T_i)\beta/\alpha}]$ ) | SNF    | $\alpha = 1.23$ ,<br>$\beta = 0.31$ ,<br>$T_i = 0.22$ | 0.98                    | 72.05  | 3.20   |
|                                                                            | pH 7.4 | $\alpha = 1.89$ ,<br>$\beta = 0.24$ ,<br>$T_i = 0.33$ | 0.95                    | 82.56  | 2.31   |

<sup>a</sup>Best fit release kinetic model for free FVR.  $F$ : fraction (%) of drug released in time  $t$ ;  $k_0$ : zero-order release constant;  $k_1$ : first-order release constant;  $k_H$ : Higuchi release constant;  $k_{KP}$ : release constant incorporating structural and geometric characteristics of the drug-dosage form;  $n$ : diffusional exponent indicating the drug release mechanism;  $\alpha$ : scale parameter defining the time scale of the process;  $\beta$  is shape parameter characterizing the curve shape as exponential ( $\beta = 1$ ), sigmoid or S-shaped, with upward curvature followed by a turning point ( $\beta > 1$ ), or parabolic, with a higher initial slope and then consistent with an exponential ( $\beta < 1$ ) [2];  $T_i$ : location parameter representing the lag time before the onset of the dissolution or release process, which in most cases will be near zero;  $k_{HC}$  is the Hixson-Crowell release constant. The transport mechanism based on the “ $n$ ” value of Korsmeyer-Peppas is described as: (1)  $n \leq 0.5$ , the drug diffusion from the polymer matrix corresponds to a Fickian diffusion or a quasi-Fickian diffusion mechanism. (2)  $0.5 < n < 1$ , an anomalous, non-Fickian drug diffusion occurs. (3)  $n = 1$ , a non-Fickian, case of II (relaxational) transport or zero-order release kinetics could be observed, and (4)  $n > 1$ , super case II transport was observed [3].

**Table S5** Release kinetic of FVR from ALG-NPs

| Model                                                                         | Media  | Parameter                                             | Adjusted R <sup>2</sup> | AIC    | MSC    |
|-------------------------------------------------------------------------------|--------|-------------------------------------------------------|-------------------------|--------|--------|
| Zero order<br>( $F = k_0 \cdot t$ )                                           | SNF    | $K_0 = 5.34$                                          | − 1.26                  | 135.74 | − 1.51 |
|                                                                               | pH 7.4 | $K_0 = 6.36$                                          | − 1.34                  | 140.87 | − 1.5  |
| First order<br>( $F = 100 \cdot e^{-k_1 t}$ )                                 | SNF    | $k_1 = 0.19$                                          | 0.42                    | 116.60 | − 0.14 |
|                                                                               | pH 7.4 | $k_1 = 0.33$                                          | 0.72                    | 110.66 | 0.6    |
| Higuchi<br>( $F = k_H \cdot t^{0.5}$ )                                        | SNF    | $K_H = 21.95$                                         | 0.46                    | 115.78 | − 0.08 |
|                                                                               | pH 7.4 | $K_H = 26.24$                                         | 0.44                    | 120.72 | − 0.12 |
| Korsmeyer-Peppas<br>( $F = k_{KP} \cdot t^n$ )                                | SNF    | $k_{KP} = 40.62$ ,<br>$n = 0.22$                      | 0.91                    | 90.40  | 1.73   |
|                                                                               | pH 7.4 | $k_{KP} = 48.82$ ,<br>$n = 0.22$                      | 0.92                    | 93.94  | 1.79   |
| Hixson-Crowell<br>( $F = 100 \cdot [1 - (1 - k_{HC} \cdot t)^3]$ )            | SNF    | $k_{HC} = 0.05$                                       | 0.2492                  | 120.24 | − 0.40 |
|                                                                               | pH 7.4 | $k_{HC} = 0.06$                                       | 0.4672                  | 119.94 | − 0.06 |
| <sup>a</sup> Weibull<br>( $F = 100 \cdot [1 - e^{-(t-T_i)^{\beta/\alpha}}]$ ) | SNF    | $\alpha = 1.67$ ,<br>$\beta = 0.28$ ,<br>$T_i = 0.24$ | 0.97                    | 72.47  | 3.01   |
|                                                                               | pH 7.4 | $\alpha = 1.36$ ,<br>$\beta = 0.36$ ,<br>$T_i = 0.20$ | 0.98                    | 72.62  | 3.32   |

<sup>a</sup>Best fit release kinetic model for free FVR.  $F$ : fraction (%) of drug released in time  $t$ ;  $k_0$ : zero-order release constant;  $k_1$ : first-order release constant;  $k_H$ : Higuchi release constant;  $k_{KP}$ : release constant incorporating structural and geometric characteristics of the drug-dosage form;  $n$ : diffusional exponent indicating the drug release mechanism;  $\alpha$ : scale parameter defining the time scale of the process;  $\beta$  is shape parameter characterizing the curve shape as exponential ( $\beta = 1$ ), sigmoid or S-shaped, with upward curvature followed by a turning point ( $\beta > 1$ ), or parabolic, with a higher initial slope and then consistent with an exponential ( $\beta < 1$ ) [2];  $T_i$ : location parameter representing the lag time before the onset of the dissolution or release process, which in most cases will be near zero;  $k_{HC}$  is the Hixon-Crowell release constant. The transport mechanism based on the “ $n$ ” value of Korsmeyer-Peppas is described as: (1)  $n \leq 0.5$ , the drug diffusion from the polymer matrix corresponds to a Fickian diffusion or a quasi-Fickian diffusion mechanism. (2)  $0.5 < n < 1$ , an anomalous, non-Fickian drug diffusion occurs. (3)  $n = 1$ , a non-Fickian, case of II (relaxational) transport or zero-order release kinetics could be observed, and (4)  $n > 1$ , super case II transport was observed [3].

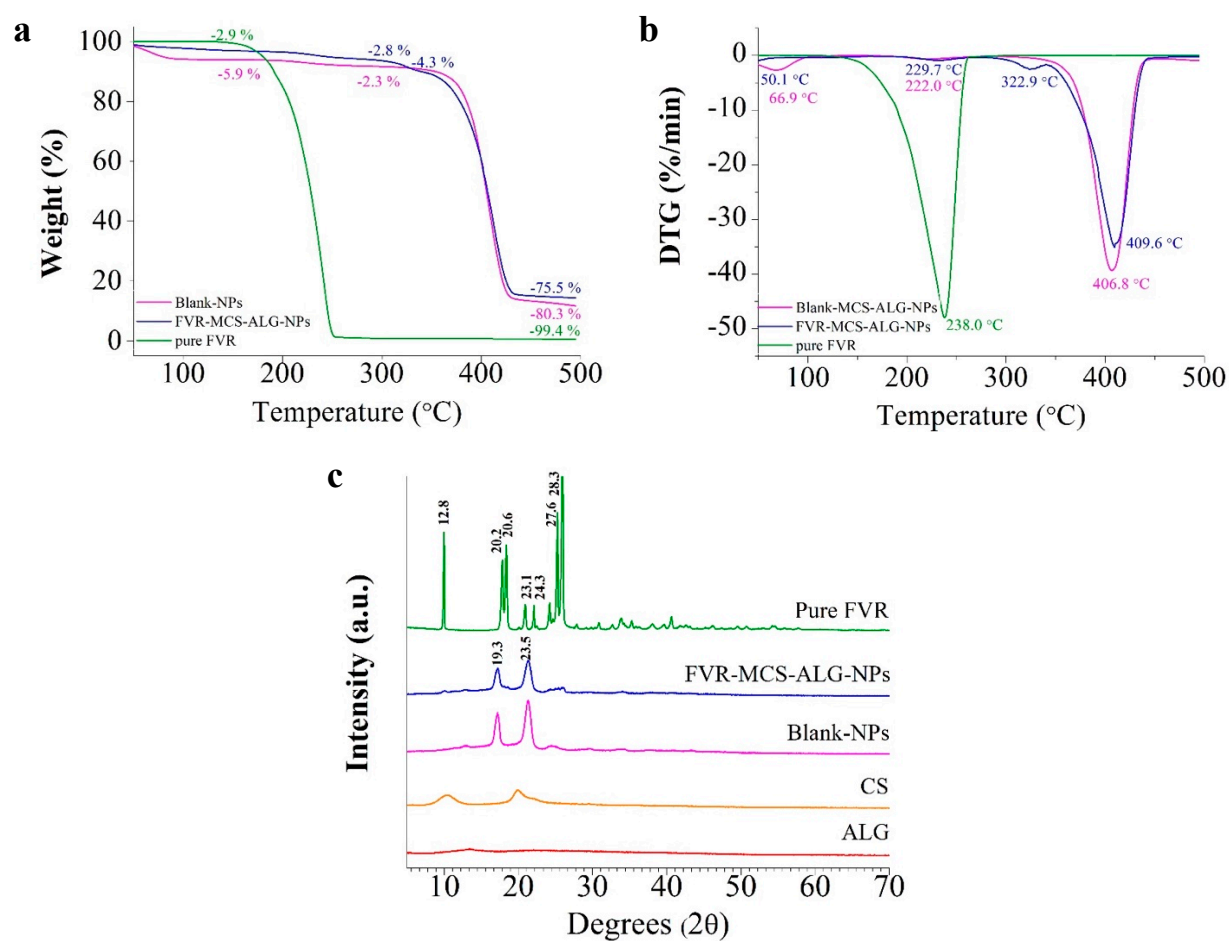

**Figure S1.** Characteristics of optimized FVR-MCS-ALG-NPs compared with the excipients: **(a)** TGA, **(b)** DTG thermal curves and **(c)** XRD pattern.

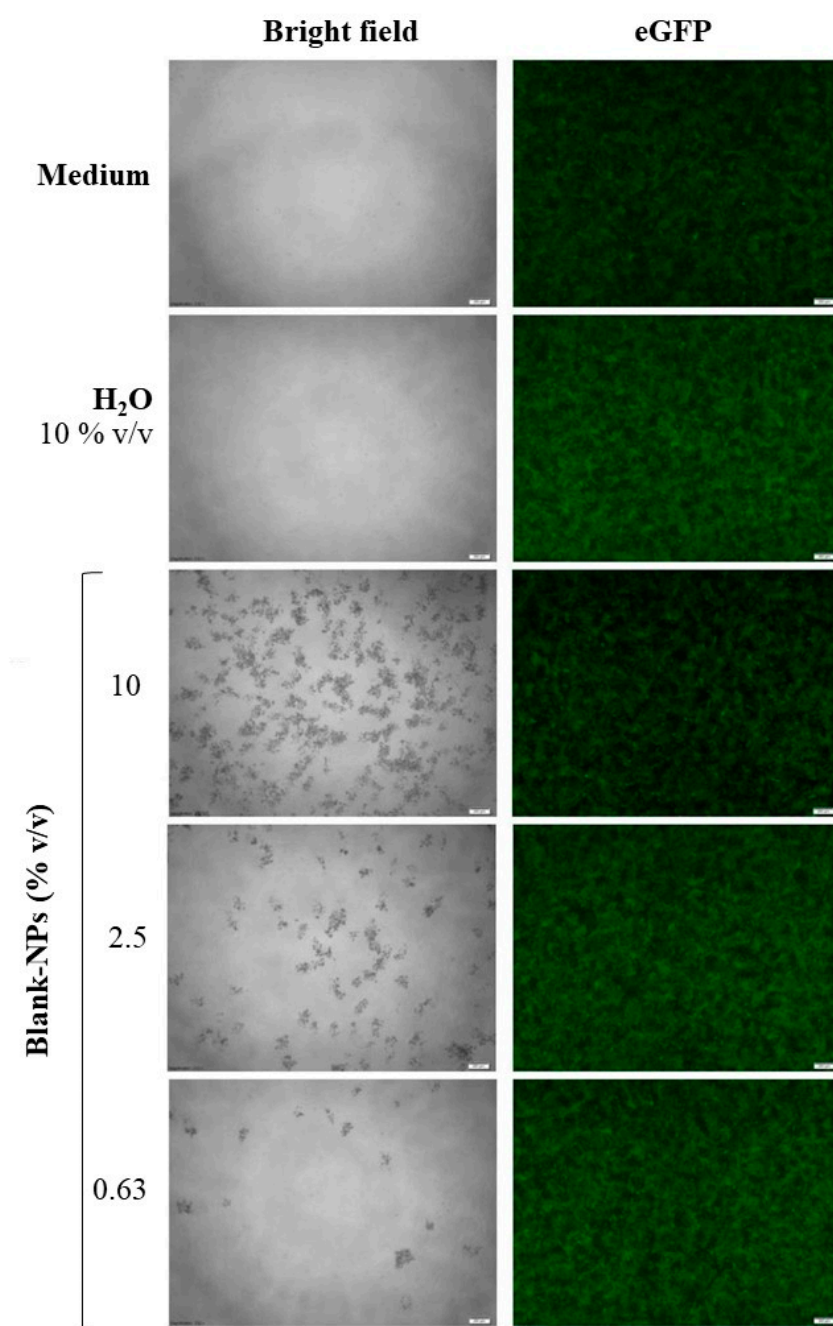

**Figure S2.** Cytotoxicity of the FVR-MCS-ALGP-NPs. eGFP-Vero cells were treated with H<sub>2</sub>O or NPs at the indicated concentrations for 18 h. Control cells were the cells cultured in medium only. Cell viability was visualized by fluorescent microscopy and measured with a CCK-8 kit at an absorbance of 450 nm using a spectrophotometer.



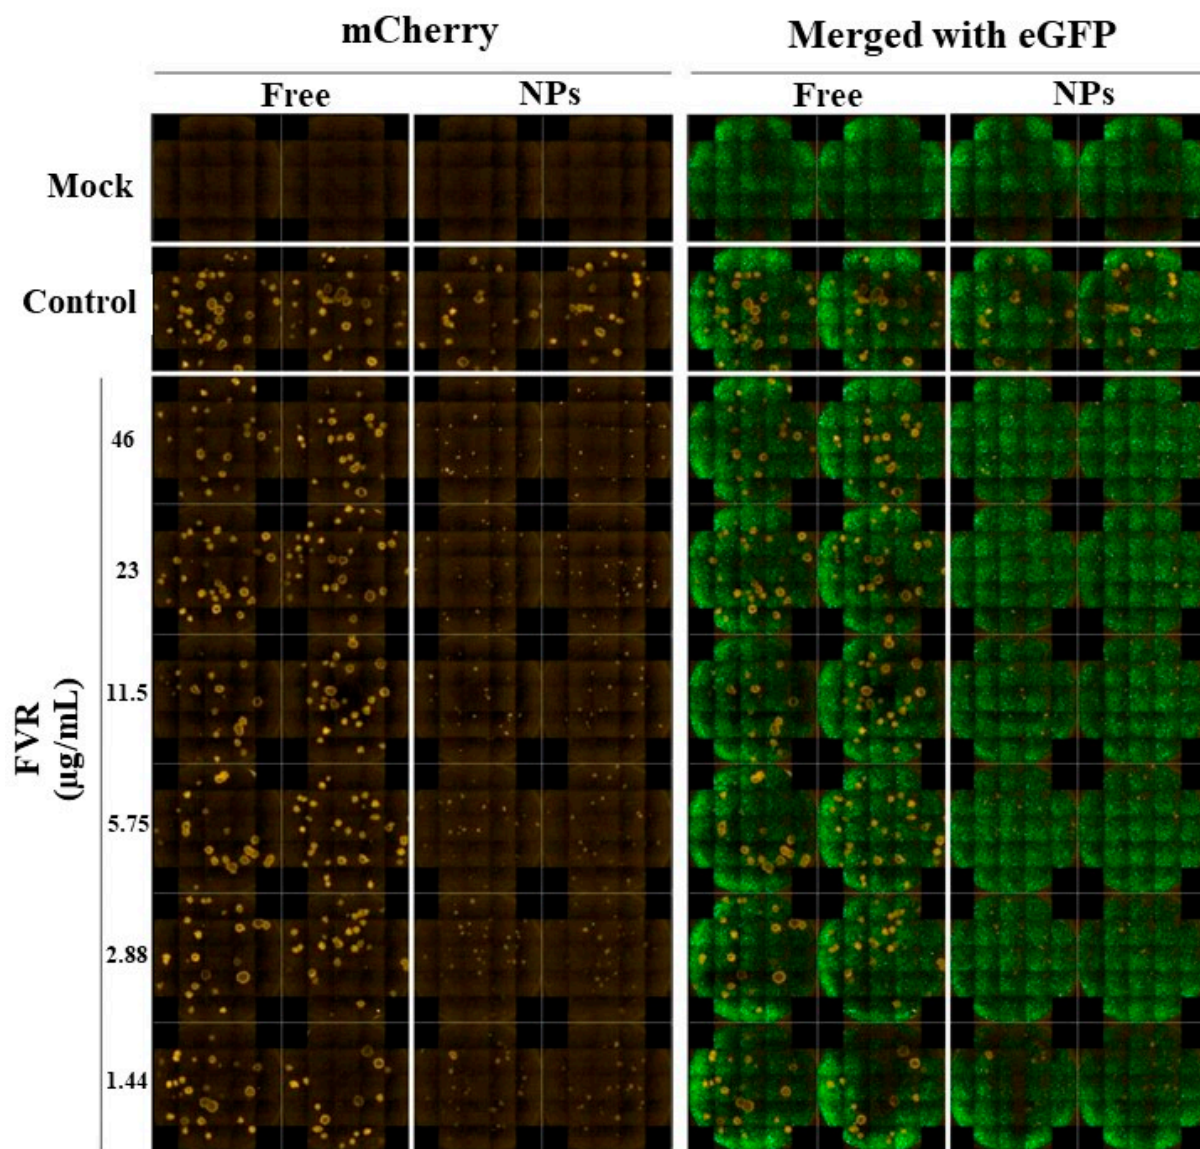

**Figure S3.** Antiviral effect of FVR (formulated and unformulated) from experiment 2. The stitched image of mCherry and eGFP signals from the cells were acquired by a high-content imaging system at 21 images/well. Each condition was tested in duplicate.

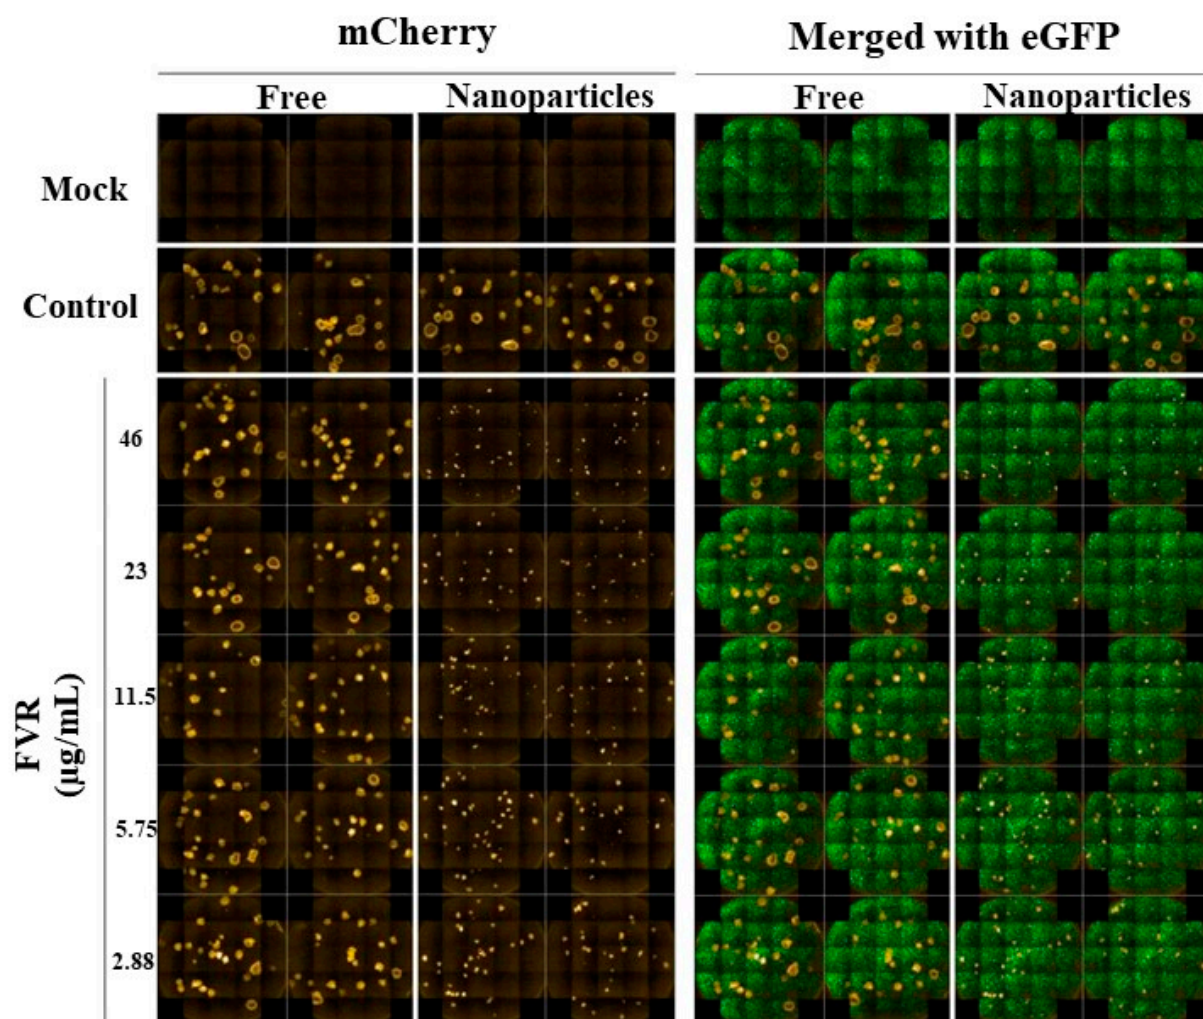

**Figure S4.** Antiviral effect of FVR (formulated and unformulated) from experiment 3. The stitched image of mCherry and eGFP signals from the cells were acquired by a high-content imaging system at 21 images/well. Each condition was tested in duplicate.

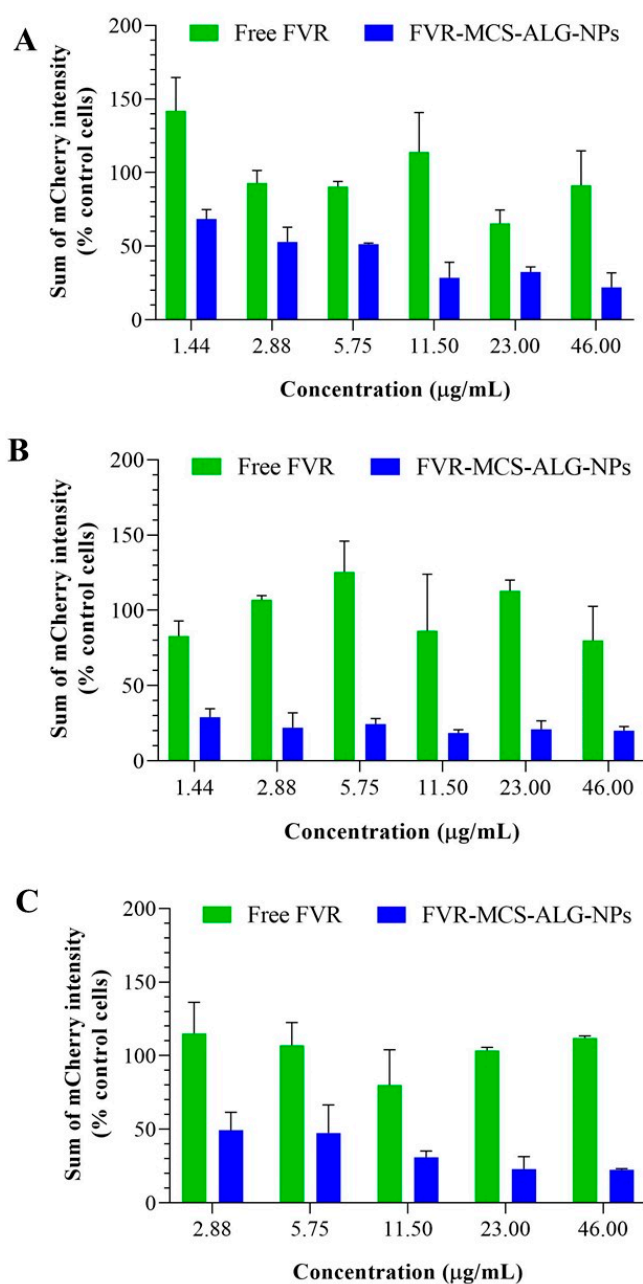

**Figure S5.** Quantitative data of the antiviral effect of FVR (formulated and unformulated) from 3 independent experiments. The mCherry fluorescent intensity of the infected cells treated with FVR from experiment 1 (A) (from Figure 7e), experiment 2 (B) (from Figure S3), and experiment 3 (C) (from Figure S4) was measured by the high-content imaging system. Data are shown as mean  $\pm$  SD of the relative sum of mCherry fluorescent intensity (% control).

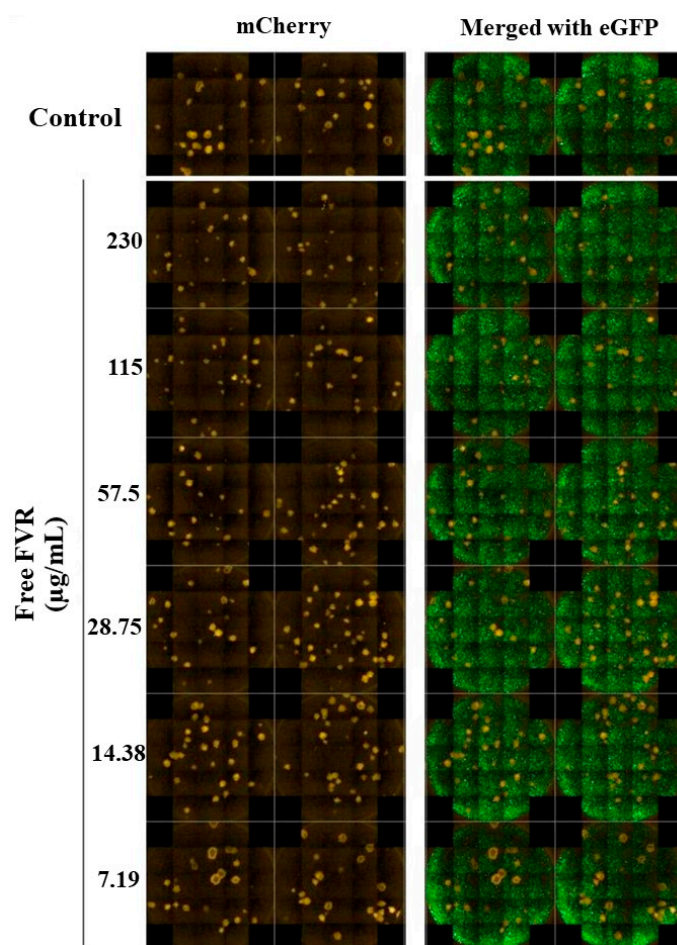

**Figure S6.** Antiviral effects of free FVR at high concentrations. The stitched images of the mCherry and eGFP signals from the cells were acquired by a high-content imaging system from the mCherry fluorescence intensity data in Figure 7d.

## References

1. Jengarn, J., et al., *Genetic manipulation of porcine epidemic diarrhoea virus recovered from a full-length infectious cDNA clone*. J Gen Virol, 2015. **96**(8): p. 2206-2218.
2. Heredia, N.S., et al., *Comparative statistical analysis of the release kinetics models for nanoprecipitated drug delivery systems based on poly(lactic-co-glycolic acid)*. PLoS One, 2022. **17**(3): p. e0264825.
3. Sorasitthyanukarn, F.N., et al., *Chitosan/alginate nanoparticles as a promising carrier of novel curcumin diethyl diglutarate*. Int J Biol Macromol, 2019. **131**: p. 1125-1136.
